# Supplementary material
Source: HighWire-hosted journal article supplement (http://d2538ggaoe6cji.cloudfront.net/highwire/filestream/44730/field_highwire_adjunct_files/3/150227-4.pdf)
Supplement: 150227-4.pdf [file 150227-4.pdf]

**Table S3. Strains, bacteriophages, plasmids used in this study**

| <b>Bacterial strains</b>      | <b>Details</b>                                                                                                                                                            | <b>Source or reference</b> |
|-------------------------------|---------------------------------------------------------------------------------------------------------------------------------------------------------------------------|----------------------------|
| <i>Pseudomonas aeruginosa</i> |                                                                                                                                                                           |                            |
| PAO1                          | wild type                                                                                                                                                                 | lab collection             |
| PAO1 NP                       | <i>pilA</i> mutant of PAO1, with Tn5-phoA insertion at base 163 in <i>pilA</i>                                                                                            | 1                          |
| <i>Escherichia coli</i>       |                                                                                                                                                                           |                            |
| SM10                          | <i>thi-1, thr, leu, tonA, lacy, supE, recA, RP4-2-Tcr::Mu, Kmr</i> ; mobilizes plasmids into <i>P. aeruginosa</i> via conjugation                                         | 2                          |
| DH5a                          | F- $\Phi$ 80lacZ $\Delta$ M15 $\Delta$ (lacZYA-argF) U169 <i>recA1 endA1 hsdR17</i> ( <i>rK-</i> , <i>mK+</i> ) <i>phoA supE44 <math>\lambda</math>-thi-1gyrA96 relA1</i> | Thermo-Fisher Scientific   |
| <b>Bacteriophages</b>         |                                                                                                                                                                           |                            |
| DMS3                          |                                                                                                                                                                           | 3                          |
| JBD26                         |                                                                                                                                                                           | 4                          |
| JBD26 chimera                 | JBD26 with <i>gp58-59-60</i> replaced by <i>gp48-49-50-51</i> from DMS3                                                                                                   | this study                 |
| JBD68                         |                                                                                                                                                                           | 4                          |
| JBD8                          |                                                                                                                                                                           | 4                          |
| JBD23                         |                                                                                                                                                                           | 4                          |
| JBD24                         |                                                                                                                                                                           | 4                          |
| JBD35C                        |                                                                                                                                                                           | 4                          |
| JBD69                         |                                                                                                                                                                           | 4                          |
| MP22                          |                                                                                                                                                                           | 5                          |
| MP29                          |                                                                                                                                                                           | 6                          |
| JBD88a                        |                                                                                                                                                                           | 4                          |
| JBD16c                        |                                                                                                                                                                           | 4                          |
| JBD18                         |                                                                                                                                                                           | 4                          |
| JBD25                         |                                                                                                                                                                           | 4                          |
| JBD63b                        |                                                                                                                                                                           | 4                          |
| JBD67b                        |                                                                                                                                                                           | Lab collection             |
| D3112                         |                                                                                                                                                                           | 7                          |
| JBD5                          |                                                                                                                                                                           | 4                          |
| JBD10                         |                                                                                                                                                                           | 4                          |

|                                    |                                                                                                                                                                   |            |
|------------------------------------|-------------------------------------------------------------------------------------------------------------------------------------------------------------------|------------|
| JBD30                              |                                                                                                                                                                   | 4          |
| JBD93                              |                                                                                                                                                                   | 4          |
| M6                                 |                                                                                                                                                                   | 8          |
| <b>Plasmids</b>                    |                                                                                                                                                                   |            |
| pBADGr                             | arabinose inducible broad host range vector, <i>aacC1</i> marker                                                                                                  | 9          |
| pEX18Gm                            | suicide vector, colE1 origin, <i>aacC1</i> marker                                                                                                                 | 10         |
| <i>pilA<sub>I</sub></i>            | <i>pilA<sub>I</sub></i> from group I strain 1244 cloned into the MCS of pBADGr using EcoRI and HindIII                                                            | 11         |
| <i>pilA<sub>I</sub>-tfpO</i>       | <i>pilA<sub>I</sub></i> and <i>tfpO</i> from group I strain 1244 cloned into the MCS of pBADGr using EcoRI and HindIII                                            | 12         |
| <i>pilA<sub>I</sub>-S147A-tfpO</i> | <i>pilA<sub>I</sub></i> encoding a Ser147Ala mutation- <i>tfpO</i> from group I strain 1244 cloned into the MCS of pBADGr using EcoRI and HindIII                 | this study |
| <i>pilA<sub>II</sub></i>           | <i>pilA<sub>II</sub></i> from group II strain PAO1 cloned into the MCS of pBADGr using EcoRI and HindIII                                                          | 11         |
| <i>pilA<sub>IV</sub></i>           | <i>pilA<sub>IV</sub></i> from group IV strain Pa5196 cloned into the MCS of pBADGr using EcoRI and HindIII                                                        | 13         |
| <i>pilA<sub>IV</sub>-WX</i>        | <i>pilA<sub>IV</sub>-tfpW-tfpX</i> from group I strain Pa5196 cloned into the MCS of pBADGr using EcoRI and HindIII                                               | 14         |
| pUCP20-6245-51                     | Complementation construct carrying the Pa5196 orthologues of the PsPA7_6245-51 genes encoding synthesis of D-arabinofuranose polymers, lac promoter, TEM-1 marker | 13         |
| DMS3-JBD26swap                     | PCR product encompassing gp48-51 from DMS3 cloned into pEX18Gm using EcoRI and PstI                                                                               | this study |

## REFERENCES

1. Jacobs, M.A. *et al.* Comprehensive transposon mutant library of *Pseudomonas aeruginosa*. *Proc Natl Acad Sci U S A* **100**, 14339-14344 (2003).
2. Simon, R., U. Prierer, and A. Pühler. A broad host range mobilization system for in vitro genetic engineering: transposon mutagenesis in gram negative bacteria. *Bio/Technology* **1**, 784-791. (1983).
3. Zegans, M.E. *et al.* Interaction between bacteriophage DMS3 and host CRISPR region inhibits group behaviors of *Pseudomonas aeruginosa*. *J Bacteriol* **191**, 210-219 (2009).
4. Bondy-Denomy, J. *et al.* Prophages mediate defense against phage infection through diverse mechanisms. *ISME J* **10**, 2854-2866 (2016).
5. Heo, Y.J., Chung, I.Y., Choi, K.B., Lau, G.W. & Cho, Y.H. Genome sequence comparison and superinfection between two related *Pseudomonas aeruginosa* phages, D3112 and MP22. *Microbiology* **153**, 2885-2895 (2007).
6. Chung, I.Y. & Cho, Y.H. Complete genome sequences of two *Pseudomonas aeruginosa* temperate phages, MP29 and MP42, which lack the phage-host CRISPR interaction. *J Virol* **86**, 8336 (2012).
7. Wang, P.W., Chu, L. & Guttman, D.S. Complete sequence and evolutionary genomic analysis of the *Pseudomonas aeruginosa* transposable bacteriophage D3112. *J Bacteriol* **186**, 400-410 (2004).
8. Ceysens, P.J. *et al.* The genome and structural proteome of YuA, a new *Pseudomonas aeruginosa* phage resembling M6. *J Bacteriol* **190**, 1429-1435 (2008).
9. Gallant, C.V. *et al.* Common beta-lactamases inhibit bacterial biofilm formation. *Mol Microbiol* **58**, 1012-1024 (2005).
10. Hoang, T.T., Karkhoff-Schweizer, R.R., Kutchma, A.J. & Schweizer, H.P. A broad-host-range Flp-FRT recombination system for site-specific excision of chromosomally-located DNA sequences: application for isolation of unmarked *Pseudomonas aeruginosa* mutants. *Gene* **212**, 77-86 (1998).

11. Asikyan, M.L., Kus, J.V. & Burrows, L.L. Novel proteins that modulate type IV pilus retraction dynamics in *Pseudomonas aeruginosa*. *J Bacteriol* **190**, 7022-7034 (2008).
12. Kus, J.V., Tullis, E., Cvitkovitch, D.G. & Burrows, L.L. Significant differences in type IV pilin allele distribution among *Pseudomonas aeruginosa* isolates from cystic fibrosis (CF) versus non-CF patients. *Microbiology* **150**, 1315-1326 (2004).
13. Harvey, H., Kus, J.V., Tessier, L., Kelly, J. & Burrows, L.L. *Pseudomonas aeruginosa* D-arabinofuranose biosynthetic pathway and its role in type IV pilus assembly. *J Biol Chem* **286**, 28128-28137 (2011).
14. Voisin, S. *et al.* Glycosylation of *Pseudomonas aeruginosa* strain Pa5196 type IV pilins with mycobacterium-like alpha-1,5-linked d-Araf oligosaccharides. *J Bacteriol* **189**, 151-159 (2007).
